# Supplementary material for: The effect of climate on timescales of drought propagation in an ensemble of global hydrological models
Source: Copernicus journal article supplement (doi:10.5194/hess-2017-745), 2018-01-02
Supplement: Supplementary file 1 [file hess-2017-745-supplement.pdf]

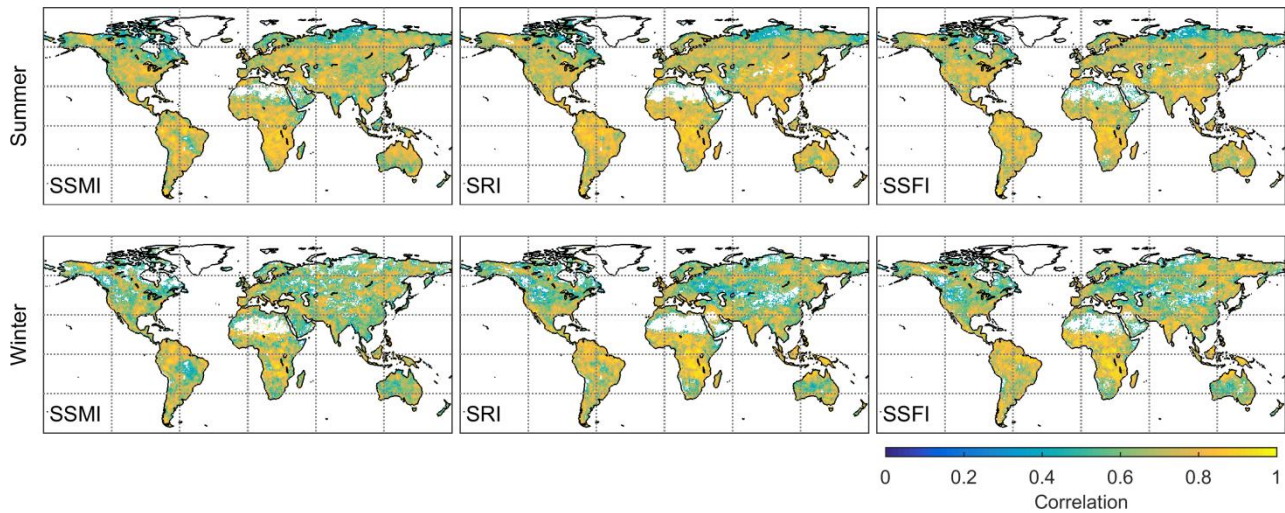

**Figure S1: Maps of the highest correlations between SPI and model ensemble mean SSMI, SRI, and SSFI, for summer and winter droughts. Pixels where those correlations are not statistically significant ( $p < 0.05$ ) are masked.**

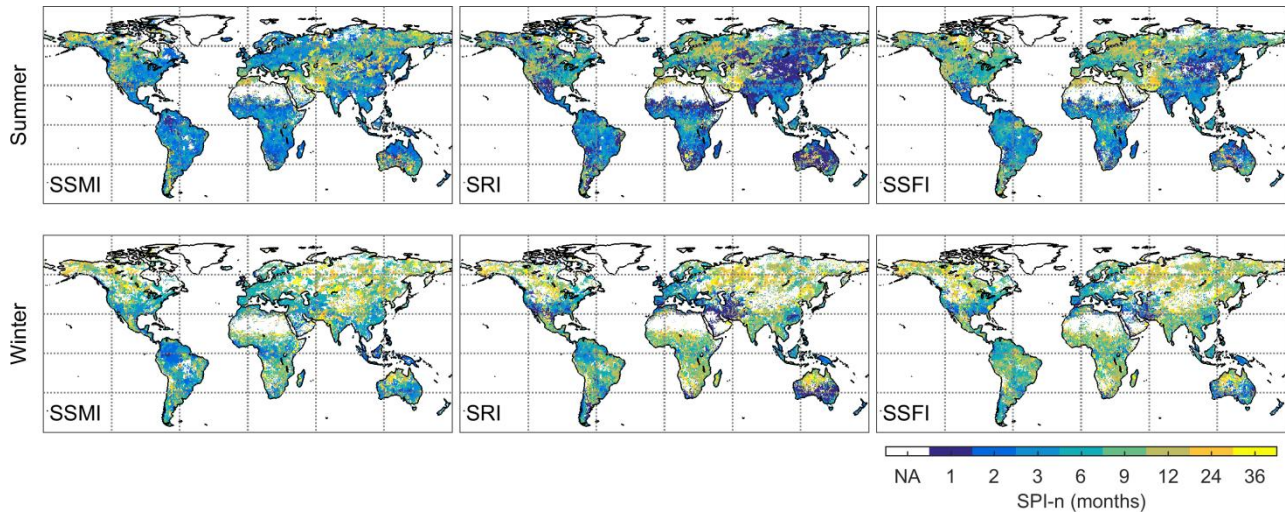

**Figure S2: The SPI accumulation period (SPI-n) resulting in the highest correlations with model ensemble mean SSMI, SRI, and SSFI, for summer and winter droughts. Droughts in SSMI, SRI, and SSFI were identified by  $SI \leq -0.5$ . Pixels where those correlations are not statistically significant ( $p < 0.05$ ) are masked.**

5

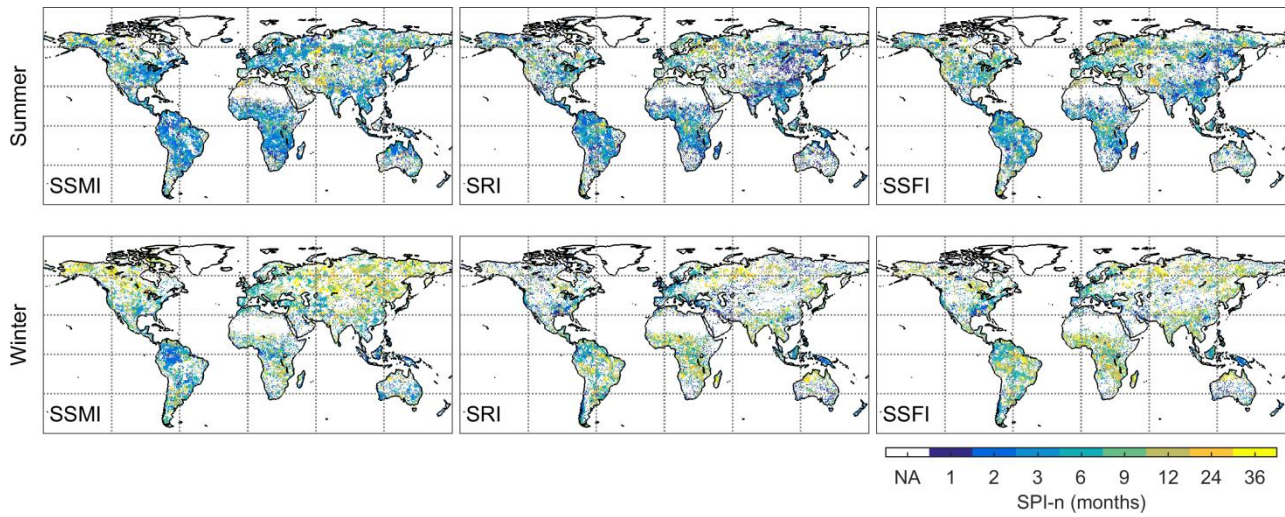

**Figure S3: The SPI accumulation period (SPI-n) resulting in the highest correlations with model ensemble mean SSMI, SRI, and SSFI, for summer and winter droughts. Droughts in SSMI, SRI, and SSFI were identified by  $SI \leq -1$ . Pixels where those correlations are not statistically significant ( $p < 0.05$ ) are masked.**
